CORRECTION

# Correction: Pedigree- and SNP-Associated Genetics and Recent Environment are the Major Contributors to Anthropometric and Cardiometabolic Trait Variation

**Charley Xia, Carmen Amador, Jennifer Huffman, Holly Trochet, Archie Campbell, David Porteous, Generation Scotland, Nicholas D. Hastie, Caroline Hayward, Veronique Vitart, Pau Navarro, Chris S. Haley**

The following information is missing from the Funding section: Genotyping of the GS:SFHS samples was carried out by the Genetics Core Laboratory at the Wellcome Trust Clinical Research Facility, Edinburgh, Scotland and was funded by the Medical Research Council UK and the Wellcome Trust (Wellcome Trust Strategic Award “STratifying Resilience and Depression Longitudinally” (STRADL) Reference 104036/Z/14/Z).

These additional funders had no role in study design, data collection and analysis, decision to publish, or preparation of the manuscript.

## Reference

1. Xia C, Amador C, Huffman J, Trochet H, Campbell A, Porteous D, et al. (2016) Pedigree- and SNP-Associated Genetics and Recent Environment are the Major Contributors to Anthropometric and Cardiometabolic Trait Variation. *PLoS Genet* 12(2): e1005804. doi: [10.1371/journal.pgen.1005804](https://doi.org/10.1371/journal.pgen.1005804) PMID: [26836320](https://pubmed.ncbi.nlm.nih.gov/26836320/)

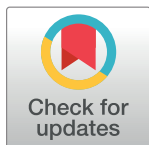

## OPEN ACCESS

**Citation:** Xia C, Amador C, Huffman J, Trochet H, Campbell A, Porteous D, et al. (2017) Correction: Pedigree- and SNP-Associated Genetics and Recent Environment are the Major Contributors to Anthropometric and Cardiometabolic Trait Variation. *PLoS Genet* 13(2): e1006608. doi:[10.1371/journal.pgen.1006608](https://doi.org/10.1371/journal.pgen.1006608)

**Published:** February 14, 2017

**Copyright:** © 2017 Xia et al. This is an open access article distributed under the terms of the [Creative Commons Attribution License](https://creativecommons.org/licenses/by/4.0/), which permits unrestricted use, distribution, and reproduction in any medium, provided the original author and source are credited.
